# Supplementary material for: Enabling the sustainable recycling of LiFePO4 from spent lithium-ion batteries
Source: Royal Society of Chemistry journal article supplement (doi:10.1039/d1gc04784a), 2022-01-01
Supplement: d1gc04784a1.pdf [file d1gc04784a1.pdf]

## Supplemental information

### Enabling Sustainable recycling of $\text{LiFePO}_4$ from spent lithium-ion batteries

Xuejing Qiu<sup>a</sup>, Baichao Zhang<sup>a</sup>, Yunlong Xu<sup>a</sup>, Jiugang Hu<sup>a</sup>, Wentao Deng<sup>a</sup>,  
Guoqiang Zou<sup>a</sup>, Hongshuai Hou<sup>a</sup>, Yue Yang<sup>b</sup>, Wei Sun<sup>b</sup>, Yuehua Hu<sup>b</sup>, Xiaoyu Cao<sup>c</sup>,  
Xiaobo Ji<sup>a,\*</sup>

<sup>a</sup> College of Chemistry and Chemical Engineering

Central South University

Changsha 410083, China

<sup>b</sup> School of Minerals Processing and Bioengineering

Central South University

Changsha 410083, China

<sup>c</sup> School of Chemistry and Chemical engineering

Henan University of Technology

Zhengzhou 450001, China

E-mail: xji@csu.edu.cn

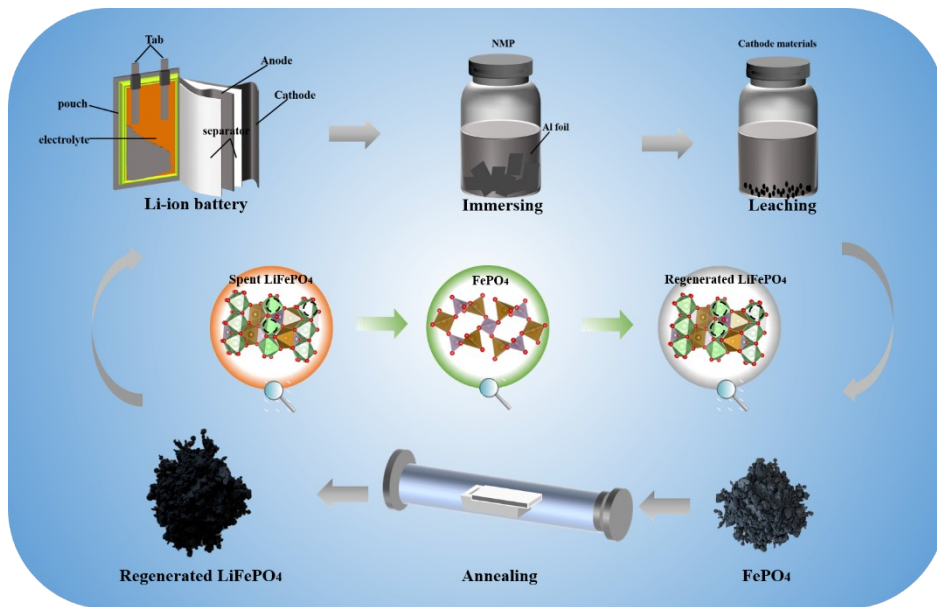

Fig. S1. The presentation of the oxidated leaching for the regeneration LFP cathode material.

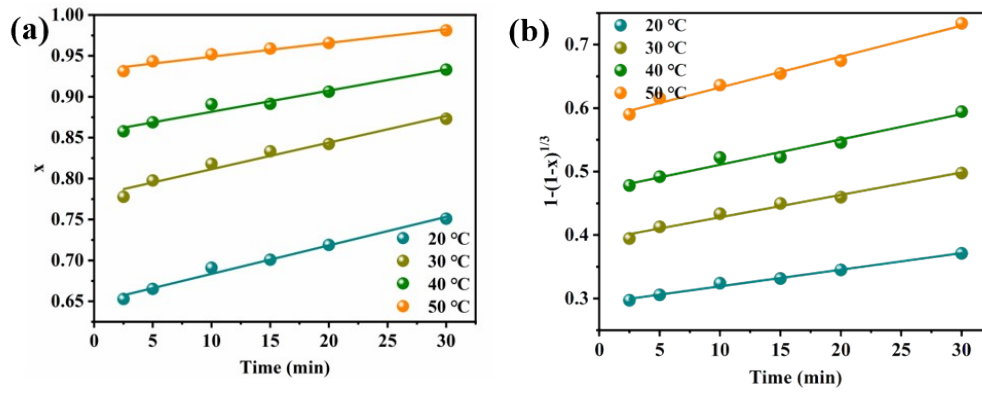

Fig. S2. Kinetics fitting data at different temperatures for (a) external diffusion model, (b) chemical reaction model.

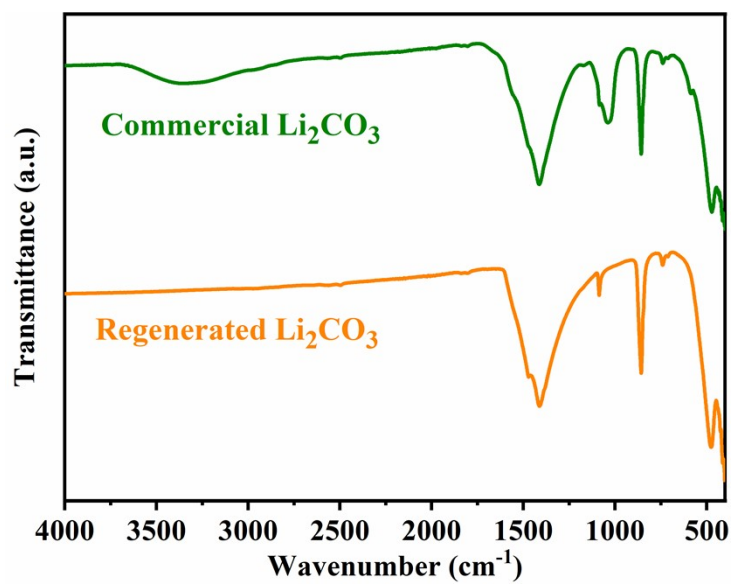

Fig. S3 FT-IR spectra of the samples from the lithium enriched filtrate and that of the commercial Li<sub>2</sub>CO<sub>3</sub>.

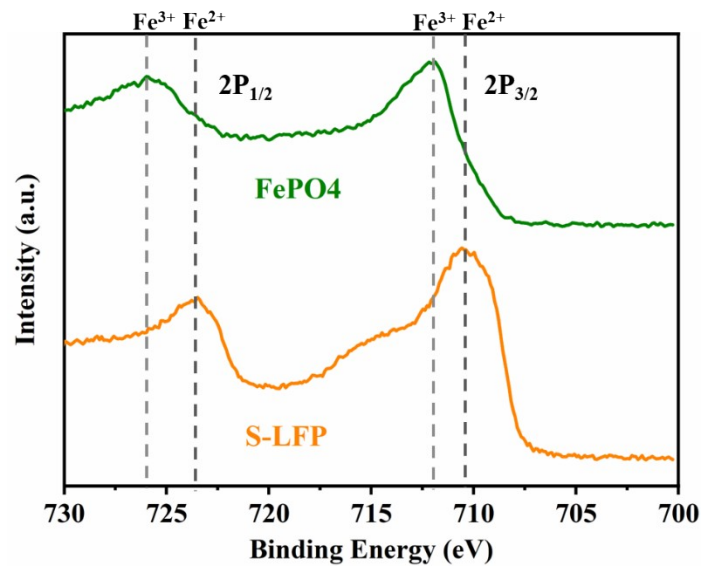

Fig. S4 XPS spectra of Fe 2p for the S-LFP and FePO<sub>4</sub>.

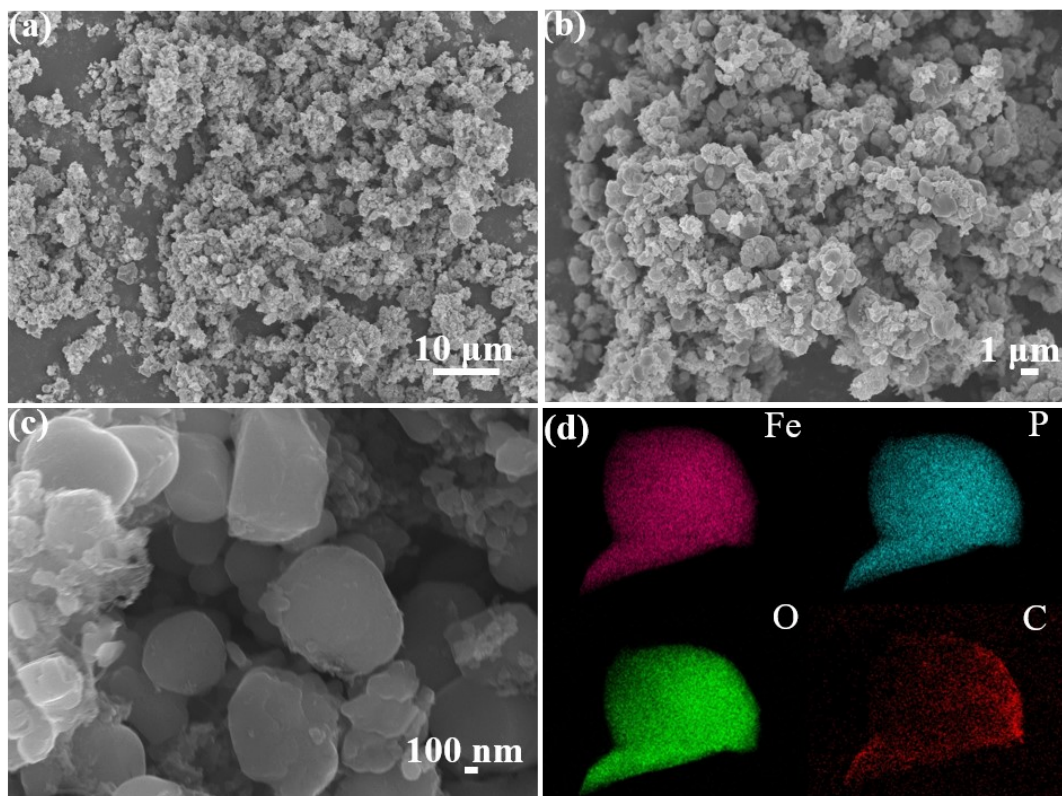

Fig. S5 (a, b, c) SEM images and (d) elemental mapping of the spent  $\text{LiFePO}_4$ .

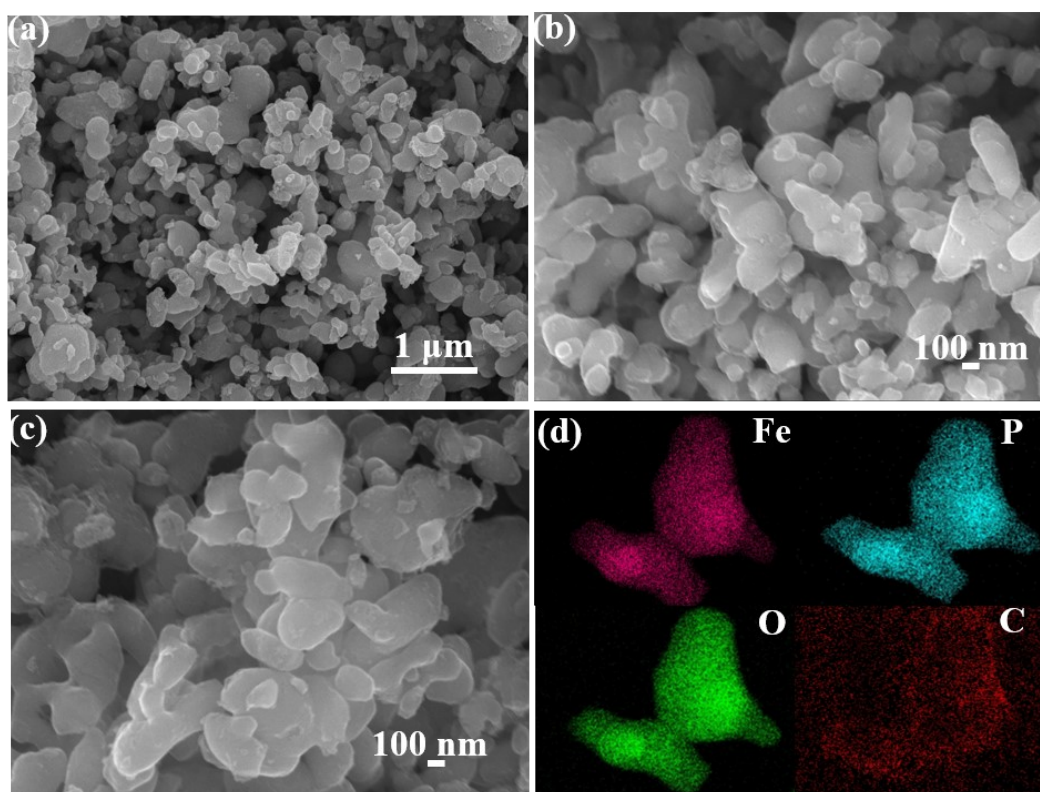

Fig. S6 (a, b, c) SEM images and (d) elemental mapping of FePO<sub>4</sub> by hydrogen peroxide leaching.

Table S1. The main composition of the spent  $\text{LiFePO}_4$  cathode materials

| Element         | Li   | Fe    | P     | Al   |
|-----------------|------|-------|-------|------|
| Content (wt. %) | 3.61 | 36.34 | 20.15 | 0.01 |



Table S2 Kinetics leaching results at different temperatures and different times

| Temperature (°C) | Leaching efficiency (%) |      |      |      |      |      |      |
|------------------|-------------------------|------|------|------|------|------|------|
|                  | Time (min)              | 2.5  | 5    | 10   | 15   | 20   | 30   |
| 20               |                         | 65.2 | 66.5 | 69.1 | 70.0 | 71.8 | 75.1 |
| 30               |                         | 77.7 | 79.7 | 81.8 | 83.3 | 84.2 | 87.3 |
| 40               |                         | 85.7 | 86.8 | 89.0 | 89.1 | 90.6 | 93.3 |
| 50               |                         | 93.1 | 94.3 | 95.1 | 95.8 | 96.5 | 98.1 |

Table S3 Kinetics fitting data of x vs. time at different temperatures

| Temperature (°C) | Kinetics fitting data |        |        |        |        |        |        |
|------------------|-----------------------|--------|--------|--------|--------|--------|--------|
|                  | Time (min)            | 2.5    | 5      | 10     | 15     | 20     | 30     |
| 20               |                       | 0.6528 | 0.6650 | 0.6911 | 0.7008 | 0.7189 | 0.7510 |
| 30               |                       | 0.7779 | 0.7975 | 0.9190 | 0.8334 | 0.8421 | 0.8730 |
| 40               |                       | 0.8577 | 0.8687 | 0.8907 | 0.8913 | 0.9061 | 0.9331 |
| 50               |                       | 0.9311 | 0.9432 | 0.9518 | 0.9586 | 0.965  | 0.9810 |

Table S4 Kinetics fitting data of  $1-2/3x-(1-x)^{2/3}$  vs. time at different temperatures

| Temperature (°C) | Kinetics fitting data |        |        |        |        |        |        |
|------------------|-----------------------|--------|--------|--------|--------|--------|--------|
|                  | Time (min)            | 2.5    | 5      | 10     | 15     | 20     | 30     |
| 20               |                       | 0.0708 | 0.0743 | 0.0823 | 0.0854 | 0.0916 | 0.1035 |
| 30               |                       | 0.1146 | 0.1235 | 0.1335 | 0.1416 | 0.1464 | 0.1653 |
| 40               |                       | 0.1556 | 0.1625 | 0.1776 | 0.1780 | 0.1894 | 0.2132 |
| 50               |                       | 0.2125 | 0.2234 | 0.2330 | 0.2413 | 0.2504 | 0.2749 |

Table S5 Kinetics fitting data of  $1-(1-x)^{1/3}$  vs. time at different temperatures

| Temperature (°C) | Kinetics fitting data |        |        |        |        |        |        |
|------------------|-----------------------|--------|--------|--------|--------|--------|--------|
|                  | Time (min)            | 2.5    | 5      | 10     | 15     | 20     | 30     |
| 20               |                       | 0.2971 | 0.3055 | 0.4340 | 0.3311 | 0.3449 | 0.3709 |
| 30               |                       | 0.3943 | 0.4128 | 0.4333 | 0.4497 | 0.4595 | 0.4974 |
| 40               |                       | 0.4779 | 0.4918 | 0.5219 | 0.5227 | 0.5455 | 0.5942 |
| 50               |                       | 0.5901 | 0.6156 | 0.6360 | 0.6543 | 0.6747 | 0.7334 |

Table S6 Results of average Li<sup>+</sup> diffusion coefficient for R-LFP and S-LFP calculated by electrochemical impedance spectroscopy (EIS).

|                 | R-LFP                       | S-LFP                       |
|-----------------|-----------------------------|-----------------------------|
| Equation        | Y=a+bx                      |                             |
| Intercept (a)   | 18.89367 ± 3.484            | 81.07694 ± 12.63            |
| Slope (b)       | 31.3281 ± 0.5568            | 78.76399 ± 2.019            |
| R-square        | 0.99811                     | 0.99607                     |
| D <sub>Li</sub> | 4.66062 × 10 <sup>-15</sup> | 7.40184 × 10 <sup>-16</sup> |

## Principles and model of leaching kinetics

In the light of the conventional hydrometallurgy process, the classical shrinking core model is generally employed to depict the leaching reaction when the solid granule reacts with the leaching agent, afterwards, the unreacted nucleus will gradually shrink and disappear during the dissolving procedure. The leaching reaction includes the following steps:

- (1) The leaching agent firstly diffuses to the surface of the solid granule in the bulk solutions, referred to as external diffusion.
- (2) The leaching agent then diffuses to the solid-liquid interface of the solid granule through the fluid film, referred to as internal diffusion.
- (3) Finally, the leaching agent reacts with the solid granule, referred to as chemical reaction.

Consequently, the leaching agent diffused into the liquid phase in reverse order.

The reaction rate-controlling steps including external diffusion, internal diffusion and chemical reaction during leaching are shown in the following Eqns.

$$x=k_1t \quad (1)$$

$$1-2/3x-(1-x)^{2/3}=k_2t \quad (2)$$

$$1-(1-x)^{1/3}=k_3t \quad (3)$$

Where  $x$  is the leaching efficiency of lithium,  $k_1$ ,  $k_2$ ,  $k_3$  is the reaction rate constants, and  $t$  is the retention time (min).

Ultimately, the Arrhenius equation (Eq. (4)) was employed to determine the apparent activation energy ( $E_a$ ) for rate-controlling model<sup>1</sup>:

$$k=Ae^{-E_a/RT} \text{ or } \ln k=\ln A-E_a/RT \quad (4)$$

Where  $k$  is the rate constant,  $A$  is the frequency factor,  $E_a$  is the apparent activation energy,  $R$  is the gas constant of  $8.314\text{J}/(\text{mol K})$  and  $T$  is the thermodynamic temperature (K).

## Electrochemical impedance spectroscopy (EIS)

The oblique line in the low frequency region is equivalent to the lithium-ion diffusion rate on behalf of the Warburg impedance, which can be calculated according to the following formula:

$$Z' = K + \sigma \omega^{-1/2} \quad (5)$$

$$D_{Li} = 1/2(RT/n^2F^2AC\sigma)^2 \quad (6)$$

Where  $Z'$  is the real part of impedance,  $\omega$  is the angular frequency,  $\sigma$  is the Warburg factor based on the linearly fitting slope between  $Z'$  and  $\omega^{-1/2}$  in the low frequency region. In Eqn. (5),  $D_{Li}$  is the lithium-ion diffusion coefficient ( $\text{cm}^2 \text{s}^{-1}$ ),  $R$  is the gas constant ( $8.314 \text{ J K}^{-1} \text{ mol}^{-1}$ ),  $T$  is the absolute temperature (298 K),  $n$  is the quantity of charge transfer per mol in the reaction,  $F$  is Faraday constant ( $96485 \text{ C mol}^{-1}$ ),  $A$  is the electrode surface area ( $1.54 \text{ cm}^2$ ),  $C$  is the concentration of lithium ion in LFP ( $2.28 \times 10^{-2} \text{ mol cm}^{-3}$ , estimated by the number of lithium ion in a unit cell).



## Economic analysis

Table S7 The materials and energy consumption to dispose of 1 kg spent LiFePO<sub>4</sub> batteries<sup>2,3</sup>

|              | Items                         | Price   | Dosage | Total |
|--------------|-------------------------------|---------|--------|-------|
| Leaching     | H <sub>2</sub> O <sub>2</sub> | \$/L    | L      | \$    |
|              |                               | 0.162   | 4.1    | 0.66  |
| Leaching     | Energy cost                   | \$/kW h | kW h   | \$    |
|              |                               | 0.07    | 0.38   | 0.026 |
| Regeneration | LiOH                          | \$/kg   | g      | \$    |
|              |                               | 14.01   | 4      | 0.056 |
| Regeneration | Energy cost                   | \$/kW h | kW h   | \$    |
|              |                               | 0.07    | 0.49   | 0.034 |
| Cost         |                               |         |        | 0.776 |

(1) As listed in Table S7, the cost of reagents for the regeneration process is calculated as follow.

Hydrogen peroxide

$$0.162\$/L \times 4.1 L = 0.66\$$$

Additional LiOH<sub>2</sub>

$$14.01\$/kg \times 4 g = 0.056\$$$

(2) The energy consumption for the regeneration process is calculated as follow.

$$0.07\$/kW h \times 0.38 kW h = 0.026\$$$

$$0.07\$/kW h \times 0.49 kW h = 0.034\$$$

Calculation of benefits and profits: Approximate 1.0 kg spent  $\text{LiFePO}_4$  batteries is taken as sample, economic assessment in laboratory-scale for spent LIBs recycling is performed based on proposed process. The benefits for the whole process can be obtained from the regeneration of 269g  $\text{LiFePO}_4$ , the ultimate profits are calculated as follows.

$$\text{Profits: } 269\text{g} \times 7.7\$/\text{kg} - 1\$ - 0.66\$ - 0.056\$ - 0.026\$ - 0.034\$ = 0.295\$$$

Table S8 The comparison of different recycling processes from spent  $\text{LiFePO}_4$  cathode materials.

| Recycling Process                             | Experimental Conditions                                                                                                            | Waste Production                                          | Significance                                                                         | Ref.      |
|-----------------------------------------------|------------------------------------------------------------------------------------------------------------------------------------|-----------------------------------------------------------|--------------------------------------------------------------------------------------|-----------|
| Repair with solid phase annealing             | Annealing: 600-800°C for 1 h according to the absence of lithium, NaOH solution                                                    | Aluminum-containing alkaline waste liquid                 | Environmentally friendly recycling process, satisfactory electrochemical performance | 4         |
| Healing with relithiation and short annealing | Relithiation: 80 °C for 5 h<br>Annealing: 600 °C for 2 h                                                                           | Salt-containing wastewater                                | Safe and low-cost regenerative process, excellent electrochemical performance        | 5         |
| Acid leaching and hydrothermal synthesis      | Leaching: 70 °C for 2 h<br>Hydrothermal synthesis: 200 °C for 6 h<br>Calcination: 200 °C for 6 h                                   | Salt-containing wastewater<br>Graphite residue            | Short and efficient recycling approach<br>good electrochemical performance           | 2         |
| Organic acid leaching                         | Leaching: 60 °C for 0.5 h<br>$\text{Li}_2\text{CO}_3$ recovery: concentration by evaporation                                       | Sodium acetate solution<br>Ferric hydroxide precipitation | Selective leaching with a high recovery rate                                         | 6         |
| Redox targeting-based process                 | Electrolysis: react in the $[\text{Fe}(\text{CN})_6]^{3-}$ electrolyte<br>$\text{LiOH}$ recovery: concentration by evaporation     | $[\text{Fe}(\text{CN})_6]^{3-}$ toxic wastewater          | No corrosive chemicals and minimal chemical consumption                              | 7         |
| Oxidation leaching                            | 1.4 times amount of theoretical $(\text{NH}_4)_2\text{S}_2\text{O}_8$<br>$\text{Li}_2\text{CO}_3$ recovery: adding $\text{NaCO}_3$ | $(\text{NH}_4)_2\text{SO}_4$ solution                     | One-step oxidation leaching with separating three materials                          | 3         |
| Oxidation leaching                            | $\text{H}_2\text{O}_2$ dosage of Vol. %15<br>$\text{Li}_2\text{CO}_3$ recovery: inletting $\text{CO}_2$ gas                        | /                                                         | Green and efficient process, excellent electrochemical performance                   | This work |

## References

1. X. Chen; D. Kang; L. Cao; J. Li; T. Zhou; H. Ma. *Sep. Purif. Technol.* 2019, 210,690-697.
2. Y. Song; B. Xie; S. Song; S. Lei; W. Sun; R. Xu; Y. Yang. *Green Chemistry* 2021, 23,3963-3971.
3. D. Peng; J. Zhang; J. Zou; G. Ji; L. Ye; D. Li; B. Zhang; X. Ou. *Journal of Cleaner Production* 2021, 316,128098.
4. J. Chen; Q. Li; J. Song; D. Song; L. Zhang; X. Shi. *Green Chemistry* 2016, 18,2500-2506.
5. P. Xu; Q. Dai; H. Gao; H. Liu; M. Zhang; M. Li; Y. Chen; K. An; Y. S. Meng; P. Liu; Y. Li; J. S. Spangenberg; L. Gaines; J. Lu; Z. Chen. *Joule* 2020, 4,2609-2626.
6. Y. Yang; X. Meng; H. Cao; X. Lin; C. Liu; Y. Sun; Y. Zhang; Z. Sun. *Green Chemistry* 2018, 20,3121-3133.
7. J. Yu; X. Wang; M. Zhou; Q. Wang. *Energy & Environmental Science* 2019, 12,2672-2677.
